# Supplementary material
Source: PubMed Central journal article supplement (PMC6923895)
Supplement: Supplementary_Data.pdf [file Supplementary_Data.pdf]

Figure S1. RP11-480I12.5 promotes the expression of proliferation marker and invasion markers. (A) The western blot analysis of proliferation marker and invasion markers of CC. (B) The statistical analysis of the protein level of PCNA, MMP7 and MMP9, the relative protein level was normalized to  $\beta$ -actin (one-way ANOVA test followed by Tukey's post hoc test,  $^{**}P < 0.01$  vs. NC). CC, cervical cancer; PCNA, proliferating cell nuclear antigen; MMP, matrix metalloproteinase; NC, negative control; sh, short hairpin; OV, overexpression.

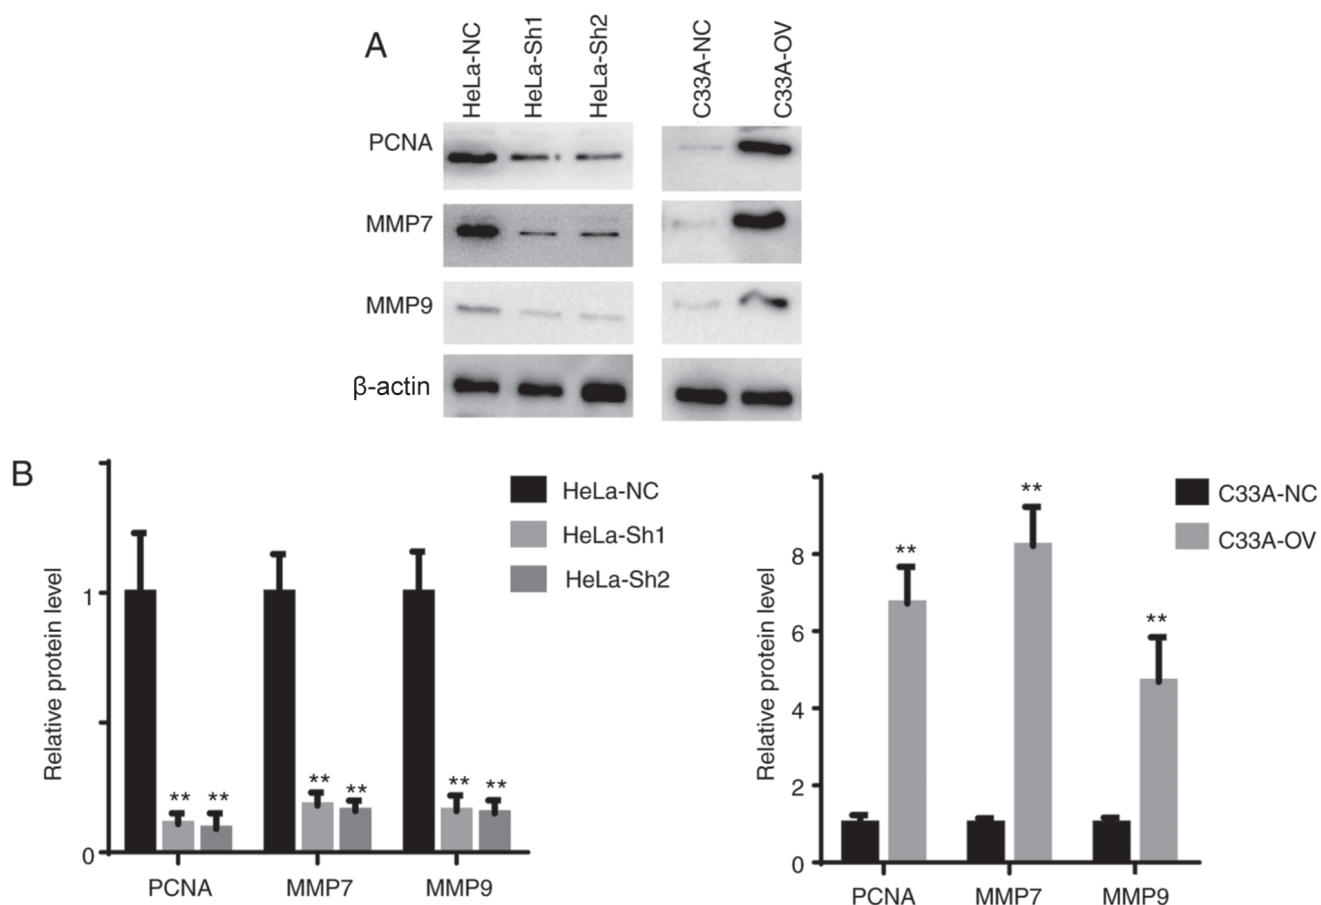

Figure S2. RP11-480I12.5 and BML284 are associated with activating the Wnt signaling pathway. (A) Cell-Counting Kit-8 assay of C33A transfected with RP11-480I12.5 and BML284 (one-way ANOVA test followed by Tukey's post hoc test, \*\*P<0.01 vs. NC). (B) The representative image of Transwell and invasion chamber of C33A cells transfected with RP11-480I12.5 and BML284 (5  $\mu$ g/ml) (magnification, x200). OV, overexpression; NC, negative control.

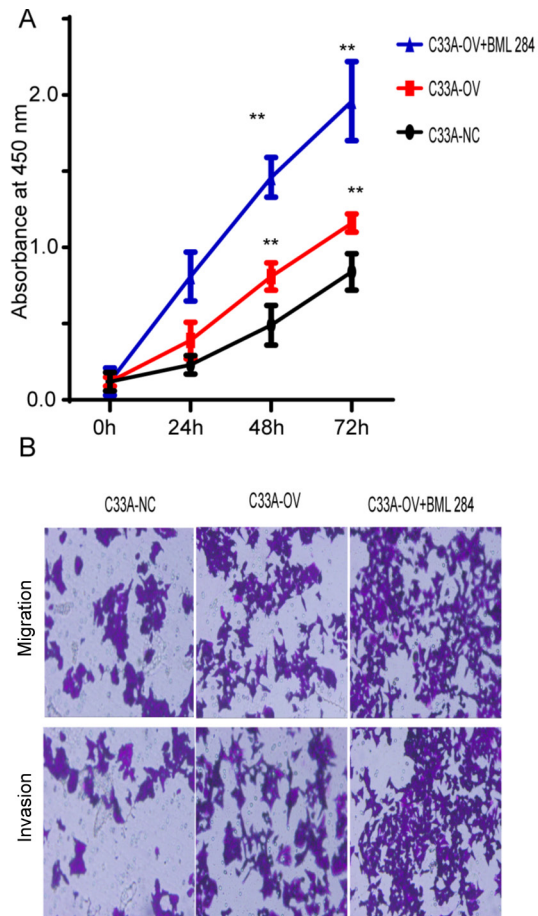

Table SI. Sequence of shRNA and plasmid.

| shRNA or plasmid        | Sequence 5'-3'                                                                                                                                                                                                                                                                                                                                                                                                                                                                                                                                                                                                                                                                                                                                                                                                                                                                                                                                                                                                                                                                                                                                           |
|-------------------------|----------------------------------------------------------------------------------------------------------------------------------------------------------------------------------------------------------------------------------------------------------------------------------------------------------------------------------------------------------------------------------------------------------------------------------------------------------------------------------------------------------------------------------------------------------------------------------------------------------------------------------------------------------------------------------------------------------------------------------------------------------------------------------------------------------------------------------------------------------------------------------------------------------------------------------------------------------------------------------------------------------------------------------------------------------------------------------------------------------------------------------------------------------|
| shRNA-1                 | AACAGAAAATAAAACAGA                                                                                                                                                                                                                                                                                                                                                                                                                                                                                                                                                                                                                                                                                                                                                                                                                                                                                                                                                                                                                                                                                                                                       |
| shRNA-2                 | ACGAACCTCTTCTGTGATGGA                                                                                                                                                                                                                                                                                                                                                                                                                                                                                                                                                                                                                                                                                                                                                                                                                                                                                                                                                                                                                                                                                                                                    |
| Vector OV               | AGTGCTGAGATTACAGGCGTGAGCCACCACCCCGGCC<br>ACTTTTTGTAAAGGTACGTACTAATGACTTTTTTTTTTATACTTCAGGAACCT<br>CTGTGATGGAGGTCACAGCCACAGACGCGGACGATGATGTGAACACCTAC<br>AATGCCGCCATCGCTTACACCATCCTCAGCCAAGATCCTGAGCTCCCTGAC<br>AAAAATATGTTCCACATTAACAGGAACACAGGAGTCATCAGTGTGGTCAC<br>CACTGGGCTGGACCGAGAGAGTTCCTACGTATAACCCTGGTGGTTCAAC<br>AAGCTGCTGACCTTCAAGGTGAGGGGTTAAGCACAGCAACAGCTGTGATC<br>ACAGTCACTGACACCAACGATAATCCTCCGATCTTCAATCCCACCACGTACA<br>AGGGTCAGGTGCCTGAGAACGAGGCTAACGTCGTAATCACCACACTGAAA<br>GTGACTGATGCTGATGCCCCAATACCCAGCGTGGGAGGCTGTATACACC<br>ATATTGAATGATGATGGTGGACAATTTGTCGTCACCACAAATCCAGTGAAC<br>AACGACAGGAACACAGGAGTCATCAGTGTGGTCACCACTGGGCTGGACCG<br>AGAGAGTTTCCCTACGTATAACCCTGGTGGTTCAAGCTGCTGACCTTCAAGG<br>GTGAGGGGTTAAGCACAACAGCAACAGCTGTGATCACAGTCACTGACAC<br>CAACGATAATCCTCCGATCTTCAATCCCACCACGTACAAGGGTCAGGTGCC<br>TGAGAACGAGGCTAACGTCGTAATCACCACACTGAAAGTGACTGATGCTG<br>ATGCCCCAATACCCAGCGTGGGAGGCTGTATACACCATATTGAATGATG<br>ATGGTGGACAATTTGTCGTCACCACAAATCCAGTGAACAACGAT                                                                                                                                                              |
| Vector negative control | CAGCGTGGGAGGCTGTATACACCATATTGAATGATGATGGTGGACAATTTG<br>TCGTCACCACAAATCCAGTGAACAACGATGGCATTGAAAACAGCAAAG<br>GGCTTGGATTTGAGGCCAAGCAGCAGTACATTCTACACGTAGCAGTGAC<br>GAATGTGGTACCTTTGAGGTCTCTCTCACCACCTCCACAGCCACCGTCAC<br>CGTGGATGTAGTGCTGAGATTACAGGCGTGAGCCACCACCCCGGCCAC<br>TTTTTGTAAAGGTACGTACTAATGACTTTTTTTTTTATACTTCAGGAACCTCTG<br>TGATGGAGGTCACAGCCACAGACGCGGACGATGATGTGAACACCTACAAT<br>GCCGCCATCGCTTACACCATCCTCAGCCAAGATCCACTAATGACTTTTTTTTT<br>TATACTTCAGGAACCTCTGTGATGGAGGTCACAGCCACAGACGCGGACGAT<br>GATGTGAACACCTACAATGCCGCCATCGCTTACACCATCCTCAGCCAAGATC<br>CTGAGCTCCCTGACAAAATATGTTCCACATTAACAGGAACACAGGAGTCA<br>TCAGTGTGGTCACCACTGGGCTGGACCGAGAGAGTTCCACCACGTACAAG<br>GGTCAGGTGCCTGAGAACGAGGCTAACGTCGTAATCACCACACTGAAAGT<br>GACTGATGCTGATGCCCCAATACCCAGCGTGGGAGGCTGTATACACCAT<br>ATTGAATGATGATGGTGGACAATTTGTCGTCACCACAAATCCAGTGAACAA<br>CGATGGCATTCTACTGGGCTGGACCGAGAGAGTTTCCCTACGTATAACCCTGG<br>TGGTTCAAGCTGCTGACCTTCAAGGTGAGGGGTTAAGCACAACAGCAACA<br>GCTGTGATCACAGTCACTGACACCAACGATAATCCTCCGATCTTCAATCCCA<br>CCACGTACAAGGGTCAGGTGCCTGAGAACGAGGCTAACGTCGTAATCACC<br>AACTGAAAGTGACTGATGCTGATGCCCCAATACCCAGCGTGGGAGGC<br>TGTATACACCATATTGAATGATGA |

shRNA, short hairpin RNA; OV, overexpression.
